# Supplementary material for: A bionic uncoated non-stick titanium pan
Source: Royal Society of Chemistry journal article supplement (doi:10.1039/d5nr01519g), 2025-01-01
Supplement: d5nr01519g1.pdf [file d5nr01519g1.pdf]

## Supplementary Information for

### Bionic Uncoated Non-Stick Titanium Pan

Xinming Wang<sup>1, #</sup>, Defeng Yan<sup>1, #</sup>, Cheng Zhang<sup>1</sup>, and Jinlong Song<sup>1, 2\*</sup>

<sup>1</sup> State Key Laboratory of High-performance Precision Manufacturing, Dalian University of Technology, Dalian Liaoning, 116024, China.

<sup>2</sup> Key Laboratory for Micro/Nano Technology and System of Liaoning Province, Dalian University of Technology, Dalian Liaoning, 116024, China.

\*Corresponding author: songjinlong@dlut.edu.cn

#Contribute equally

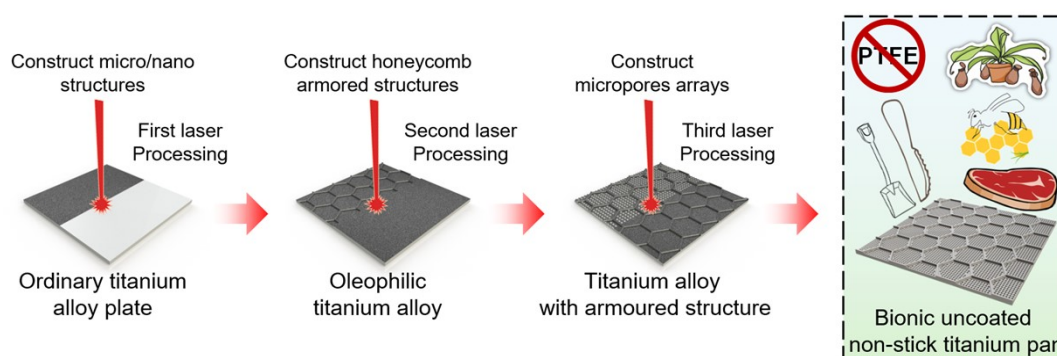

**Figure S1.** Schematic diagram of the fabrication processes of the BUNTP.

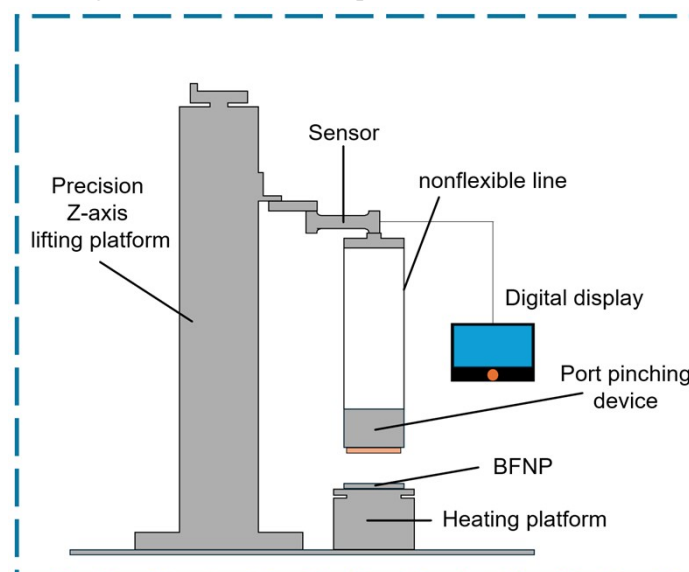

**Figure S2.** The adhesion measurement system for evaluating the anti-adhesion performance.

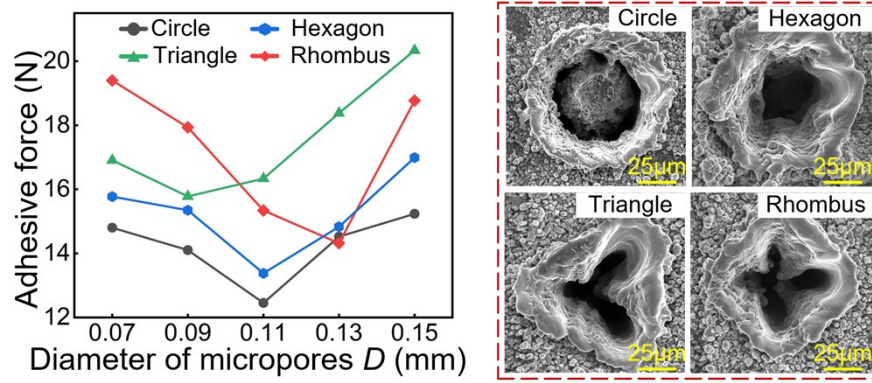

**Figure S3.** The variation of the abrasion force with different shapes of micropores.

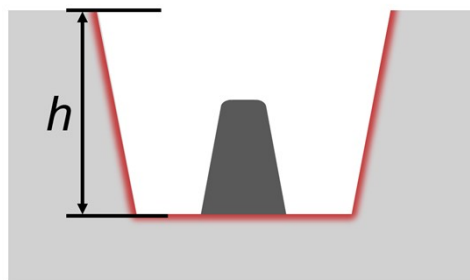

**Figure S4.** The schematic diagram of the depth of the micropore.

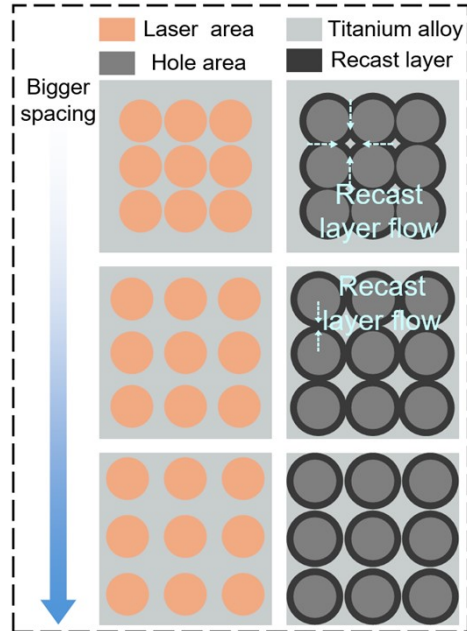

**Figure S5.** The schematic diagram of the morphology formation of the micropores at different spacings.

**Table S1.** The estimated the depth of the micropore.

| Laser processing time                 | 1 | 2  | 3  | 4  | 5  |
|---------------------------------------|---|----|----|----|----|
| Estimated depth $h$ ( $\mu\text{m}$ ) | 6 | 12 | 18 | 24 | 32 |
